# Supplementary material for: Detection of Endoparasites in Non-Native Raccoons from Central Italy
Source: MDPI journal article supplement (doi:10.3390/vetsci10020171), 2023-02-20
Supplement: s1 [file s1]

**Table S1.** Positive and negative raccoons with their respective trapping site.

| Trap ID | Raccoons |          |       |
|---------|----------|----------|-------|
|         | Negative | Positive | Total |
| 1       | 0        | 1        | 1     |
| 2       | 1        | 0        | 1     |
| 3       | 1        | 0        | 1     |
| 4       | 1        | 1        | 2     |
| 5       | 1        | 1        | 2     |
| 6       | 0        | 1        | 1     |
| 7       | 1        | 1        | 2     |
| 8       | 0        | 1        | 1     |
| 9       | 1        | 0        | 1     |
| 10      | 1        | 0        | 1     |
| 11      | 1        | 0        | 1     |
| 12      | 1        | 0        | 1     |
| 13      | 1        | 0        | 1     |
| 14      | 1        | 0        | 1     |
| 15      | 1        | 0        | 1     |
| 16      | 1        | 0        | 1     |
| 17      | 1        | 0        | 1     |
| 18      | 0        | 4        | 4     |
| 19      | 1        | 14       | 15    |
| 20      | 1        | 1        | 2     |
| 21      | 1        | 0        | 1     |
| 22      | 3        | 0        | 3     |
| 23      | 2        | 0        | 2     |
| 24      | 1        | 0        | 1     |
| 25      | 0        | 1        | 1     |
| 26      | 1        | 0        | 1     |
| 27      | 2        | 0        | 2     |
| 28      | 1        | 0        | 1     |
| 29      | 4        | 0        | 4     |
| 30      | 1        | 0        | 1     |
| 31      | 1        | 0        | 1     |
| 32      | 1        | 0        | 1     |
| Total   | 34       | 26       | 60    |
